# Supplementary material
Source: HighWire-hosted journal article supplement (https://www.jpn.ca/highwire/filestream/89707/field_highwire_adjunct_files/0/jpn-140180-1-at.pdf)
Supplement: jpn-140180-1-at.pdf [file jpn-140180-1-at.pdf]

**Appendix 1** to Frodl T, Szyf M, Carballedo A, et al. DNA methylation of the serotonin transporter gene (*SLC6A4*) is associated with brain function involved in the processing of emotional stimuli.

*J Psychiatry Neurosci* 2015.

DOI: 10.1503/jpn.140180

Copyright © 2015 The Author(s) or their employer(s). To receive this resource in an accessible format, please contact us at [cmajgroup@cmaj.ca](mailto:cmajgroup@cmaj.ca).

### Supplementary methods

#### *Emotional attention shifting task*

In the emotional awareness and shifting attention task used in the *fMRI* experiment participants were asked to process visual stimuli.<sup>23</sup> The task was event-related and consisted of 180 pseudorandomized trials belonging to 2 groups. Each trial in the task lasted 4 s and consisted of a viewing stage where participants looked at a picture, and a response stage where they answered a question concerning the picture. The questions used in the task referred either to the emotional valence of a picture (Was it positive? Was it negative? Was it neutral?) or to its shape (Was it horizontal? Was it vertical?). Participants could only answer “yes” or “no” to all the questions depending on whether, in their opinion, the question stated truth or falsehood (Fig. S1). They answered by pressing 1 of 2 buttons on a 2-button response box from Current Design Inc. with their right hand.

Participants did not know before the start of each trial which of the 5 questions mentioned would be asked. To answer correctly they had to process information about the emotional valence and the shape of the picture until the question was asked. Then the whole attention would need to be focused on either the emotional content or the shape. Therefore, 2 groups of trials emerged in the task: those with shifting the attention to the picture’s shape and those where the emotional information was processed (Fig. S1). Standardized training with training tasks outside the scanner preceded the *fMRI*.

#### Trial with attentional shifting

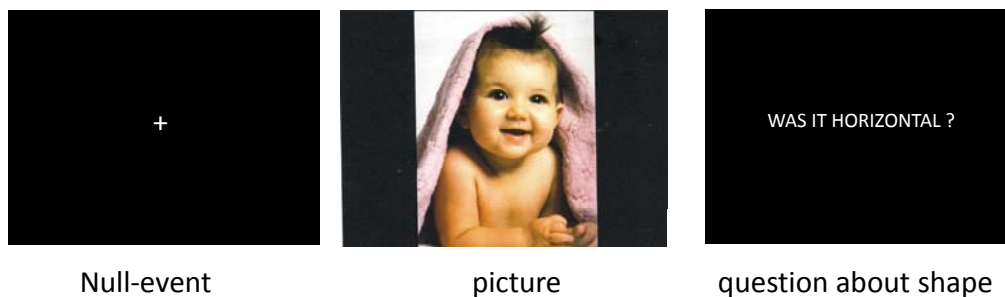

#### Trial with emotion processing

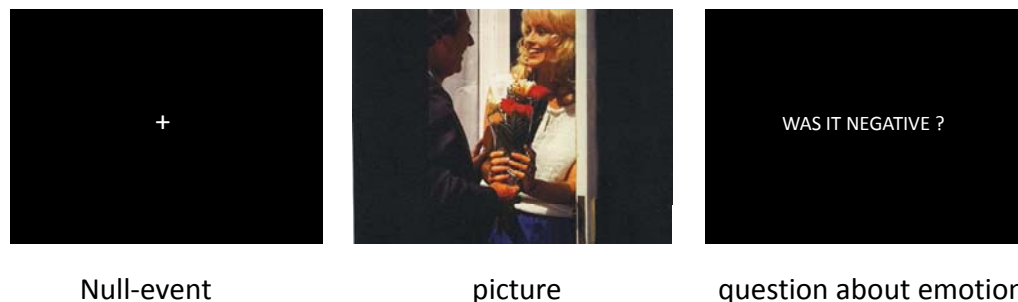

**Fig. S1:** Example of MRI trial. After seeing a cross as null-event, participants saw an image with either positive, neutral, or negative emotional valence that could be presented either horizontally or vertically. After that they were asked to either focus on the emotional content or the geometrical presentation of the image.

**Appendix 1** to Frodl T, Szyf M, Carballido A, et al. DNA methylation of the serotonin transporter gene (*SLC6A4*) is associated with brain function involved in the processing of emotional stimuli.

*J Psychiatry Neurosci* 2015.

DOI: 10.1503/jpn.140180

Pictures used in the experiment were taken from the well-validated International Affective Picture System (IAPS) database and were positive, negative or neutral in emotional valence as well as horizontal or vertical in shape, and there were 60 unrepeatable pictures in each valence category. The valence of IAPS pictures is described on a scale from 1 to 9, where 1 represents very negative and 9 very positive. Pictures in the interval from 1 to 3 were classified as negative, from 4 to 6 as neutral and from 7 to 9 as positive. The pictures selected for the experiment were as close as possible to 1, 9 and 5 for the negative, positive and neutral categories, respectively. To ensure that the chosen pictures would have a consistent appraisal in healthy population, the ones with minimal standard deviation in emotional valence and the ones judged similarly by men and women were selected. Since the examined group consisted of emotionally vulnerable participants, negative pictures presenting highly disturbing content were omitted after a consultation with a psychiatrist. In the end, the respective mean valence values for the negative, positive and neutral category were  $2.54 \pm 0.34$ ,  $7.64 \pm 0.34$  and  $4.97 \pm 0.23$ , respectively. The selected pictures of different valence and shape were randomly and equally distributed across the 2 types of trials. The trials were intervened with jittered null events, which consisted of a white cross on black background presented for 2 s on average.

*Preprocessing*

Preprocessing steps for fMRI data included realignment to correct for motion. Participants were excluded when movement parameters exceeded 1 slice thickness (4.8 mm). Three patients and 1 control had movement artifacts during the scanning, so in total fMRI data from 25 patients and 35 healthy controls were analyzed. Then co-registration of each participant's structural image to the mean of the motion-corrected functional images, slice time correction, spatial normalization and smoothing using an 8 mm full-width at half-maximum (FWHM) Gaussian kernel were applied. Data were analyzed using Statistical Parametric Mapping (SPM8). Motion correction values were added as a covariate. In first-level analyses *t* test contrasts were calculated contrasting positive or negative picture stimuli versus neutral picture stimuli, shifting attention away from negative stimuli versus shifting attention away from positive stimuli, and judging the emotional content versus judging the geometry of the images for each emotional valence separately. In consequence, a set of 6 subsequent contrasts was acquired for each individual.

*DNA methylation*

We previously targeted the entire 214-625 bp regulatory region upstream of the *SLC6A4* gene promoter (CpG 1-24).<sup>11</sup> DNA methylation of this region resulted in loss of promoter activity in transient transfection promoter-luciferase reporter assays.<sup>11</sup> In this study we used whole blood DNA, hypothesizing that differential DNA methylation of these sites would be detectable in whole blood DNA as it was in selected white blood cell subtypes. We targeted CpG sites 5-15, as CpG sites within this region were previously most strongly associated with in vivo measures of brain serotonin synthesis, in particular in CpG sites 5, 6, 11 and 12,<sup>11</sup> and thus most relevant to test our current hypotheses. The DNA methylation pattern in the target region of the *SLC6A4* gene promoter was investigated using the following 3 sets of outside primers and 4 sets of nested primers: Out F1&2 5'-TGTAGTTGGTTAATAAAATGAGAATTAGTT-3', Out R1&2 5'-AAATCCTAACCTTCCTACTCTTTAAC-TTTA-3', Out F3 5'-TTTTAGGAAGAAAGAGAG-AGTAGTTTT-3', Out R3 5'-CCAAAAAACTCTTAAAAAA-TTTTTAC-3', Out F4 5'-TTTGT-TTTTTTGTGTAGTTTTTTT-3', Out R4 5'-CTCACATAATCTAATCTC-TAAATAACC-3', Nest F1 5'-TTTTTATTGTGGAAGTTTTATTGTG-3', Nest R1 5'-CTCTCTCTTCTTCCT-AAAACCTAACA-3', Nest F2 5'-TTGTTAGTTTTAGGAAGAAAGAGAGA-3', Nest R2 5'-AAAAAAA-ACTACCAAAAAAACAATATAC-3', Nest F3 5'-TTTTAGGAAGAAAGAG-AGAGTAGTTTT-3', Nest R3 5'-AAATCCTAACCTTCCTACTCTTTAACCTTA-3', Nest F4 5'-TAAAGTTAAAGAGTAGGAAAGTTAGGATTT-3', and Nest R4 5'-ACCCCAAAACCA-AAAAAAA-3'. The nested reverse primers were biotinylated for pyrosequencing. DNA was treated with sodium bisulfite, and 2 rounds of polymerase chain reaction (PCR) amplification were performed, as previously described. We used 15  $\mu$ L of the PCR products to perform pyrosequencing using PyroMarkQ24 (Qiagen) according to the manufacturer's protocol.

**Appendix 1** to Frodl T, Szyf M, Carballedo A, et al. DNA methylation of the serotonin transporter gene (*SLC6A4*) is associated with brain function involved in the processing of emotional stimuli.

*J Psychiatry Neurosci* 2015.

DOI: 10.1503/jpn.140180

**Table S1: Behavioral data during the fMRI experiment\***

| Behaviour                                                        | Group, mean $\pm$ SD |                   | Statistic         | <i>p</i> value |
|------------------------------------------------------------------|----------------------|-------------------|-------------------|----------------|
|                                                                  | Patients             | Controls          |                   |                |
| <b>Incorrect judgment</b>                                        |                      |                   |                   |                |
| Positive images as neutral                                       | 4.8 $\pm$ 2.3        | 2.2 $\pm$ 2.2     | $F_{1,54} = 15.1$ | < 0.001        |
| Neutral images as not neutral                                    | 2.7 $\pm$ 2.4        | 4.7 $\pm$ 3.5     | $F_{1,54} = 8.5$  | 0.005          |
| Negative images as neutral                                       | 1.8 $\pm$ 2.2        | 1.1 $\pm$ 1.3     | $F_{1,54} = 0.17$ | 0.20           |
| Positive images as negative                                      | 0.65 $\pm$ 1.3       | 0.65 $\pm$ 1.0    | $F_{1,54} = 0.54$ | 0.57           |
| Neutral images as negative                                       | 1.1 $\pm$ 1.2        | 0.94 $\pm$ 1.3    | $F_{1,54} = 0.09$ | 0.76           |
| Neutral images as positive                                       | 2.8 $\pm$ 2.3        | 3.0 $\pm$ 2.2     | $F_{1,54} = 0.63$ | 0.43           |
| Negative images as positive                                      | 0.46 $\pm$ 1.0       | 0.41 $\pm$ 1.3    | $F_{1,54} = 0.30$ | 0.59           |
| <b>Reaction time</b>                                             |                      |                   |                   |                |
| Shifting attention to geometrical figure after neutral pictures  | 1031.6 $\pm$ 281.6   | 764.9 $\pm$ 226.0 | $F_{1,54} = 12.0$ | 0.001          |
| Shifting attention to geometrical figure after positive pictures | 1033.1 $\pm$ 285.4   | 776.1 $\pm$ 235.4 | $F_{1,54} = 9.4$  | 0.003          |
| Shifting attention to geometrical figure after negative pictures | 1132.4 $\pm$ 266.2   | 826.9 $\pm$ 273.9 | $F_{1,54} = 12.3$ | 0.001          |
| Focusing on emotion after neutral pictures                       | 1159.3 $\pm$ 255.4   | 968.9 $\pm$ 232.1 | $F_{1,54} = 5.2$  | 0.027          |
| Focusing on emotion after positive pictures                      | 883.4 $\pm$ 213.1    | 700.5 $\pm$ 230.0 | $F_{1,54} = 7.7$  | 0.008          |
| Focusing on emotion after negative pictures                      | 1022.0 $\pm$ 234.1   | 830.7 $\pm$ 244.1 | $F_{1,54} = 5.9$  | 0.019          |

SD = standard deviation.

\*Patients with major depressive disorder showed a processing bias toward judging stimuli as being more negative and took longer in particular to shift attention toward the geometrical shape of the image than healthy controls.

**Table S2: Clusters surviving a  $p < 0.001$  uncorrected threshold to allow comparison with the broader literature (part 1 of 4)**

| Contrast, region                                   | MNI coordinates |     |     | k   | <i>t</i> | <i>p</i> value† |
|----------------------------------------------------|-----------------|-----|-----|-----|----------|-----------------|
|                                                    | x               | y   | z   |     |          |                 |
| <b>Valence interaction, none</b>                   |                 |     |     |     |          |                 |
| <b>Emotion – neutral pictures</b>                  |                 |     |     |     |          |                 |
| Right postcentral*                                 | 24              | -25 | 55  | 394 | 4.74     | < 0.001         |
| Left precuneus extending to middle cortex cinguli* | -15             | -37 | 58  | —   | 4.42     | —               |
| Right motor area*                                  | 9               | -22 | 55  | —   | 4.36     | —               |
| Right hippocampus*                                 | 21              | -37 | 16  | 85  | 4.22     | 0.045           |
| Left superior temporal lobe                        | -60             | -40 | 16  | 18  | 4.11     | —               |
| Right dorsomedial frontal lobe                     | 6               | 56  | 31  | 19  | 4.0      | —               |
| Left precuneus                                     | -27             | -49 | 19  | 14  | 3.95     | —               |
| Left middle temporal lobe                          | -45             | -58 | 13  | 31  | 3.86     | —               |
| Left insula                                        | -42             | -16 | 1   | 19  | 3.85     | —               |
| Left cerebellum                                    | -15             | -31 | -26 | 21  | 3.84     | —               |
| Right superior frontal cortex                      | 15              | -13 | 61  | 51  | 3.83     | —               |
| Left precuneus                                     | -6              | -52 | 37  | 28  | 3.77     | —               |
| <b>Main MDD &lt; control</b>                       |                 |     |     |     |          |                 |
| Cerebellum                                         | 0               | -55 | -8  | 91  | 4.13     | 0.036           |
| <b>Negative – neutral pictures</b>                 |                 |     |     |     |          |                 |
| <b>Diagnosis x methylation interaction</b>         |                 |     |     |     |          |                 |
| Hippocampus*                                       | 15              | -7  | -8  | 266 | 4.24     | < 0.001         |
|                                                    | -6              | -13 | -14 |     |          |                 |
| Right angular                                      | 51              | -58 | 34  | 11  | 4.12     | ns              |
| Right lingual, right parahippocampal               | 12              | -34 | -17 | 23  | 3.49     | ns              |
| <b>High &gt; low methylation</b>                   |                 |     |     |     |          |                 |
| Left insula*                                       | -27             | 8   | 16  | 160 | 4.54     | 0.002           |
| Left inferior frontal operculum*                   | -45             | 2   | 17  | —   | 4.18     | —               |
|                                                    | -39             | 17  | 22  |     | 4.09     |                 |
| Right rolandic operculum                           | 42              | -1  | 22  | 21  | 4.18     | 0.53            |
| Vermis                                             | 0               | -55 | -5  | 30  | 3.55     | 0.34            |

**Appendix 1** to Frodl T, Szyf M, Carballedo A, et al. DNA methylation of the serotonin transporter gene (*SLC6A4*) is associated with brain function involved in the processing of emotional stimuli.

*J Psychiatry Neurosci* 2015.

DOI: 10.1503/jpn.140180

**Table S2: Clusters surviving a  $p < 0.001$  uncorrected threshold to allow comparison with the broader literature (part 2 of 4)**

| Contrast, region                         | MNI coordinates |     |     | k    | t    | p value† |
|------------------------------------------|-----------------|-----|-----|------|------|----------|
|                                          | x               | y   | z   |      |      |          |
| Low > high methylation, none             |                 |     |     |      |      |          |
| MDD > control                            |                 |     |     |      |      |          |
| Left paracentral lobule                  | -12             | -19 | 64  | 24   | 4.37 | ns       |
| Right SMA                                | 12              | 5   | 61  | 11   | 3.85 | ns       |
| Left cerebellum                          | -12             | -31 | -32 | 19   | 3.84 | ns       |
| Left superior frontal lobe               | -24             | -4  | 55  | 10   | 3.72 | ns       |
| Control > MDD, none                      |                 |     |     |      |      |          |
| Low > high methylation in controls, none |                 |     |     |      |      |          |
| 9                                        | 2               | 52  | 18  | 3.86 | ns   |          |
| High > low methylation in controls       |                 |     |     |      |      |          |
| Left frontal inferior operculum*         | -45             | 5   | 16  | 296  | 4.79 | < 0.001  |
| Left fusiform gyrus*                     | -24             | -37 | -17 | 630  | 4.68 | < 0.001  |
| Left rectus                              | -12             | 41  | -17 | 20   | 3.84 | ns       |
| Right rolandic operculum                 | 48              | -4  | 19  | 13   | 3.78 | ns       |
| Right frontal medial orb                 | 6               | 47  | -14 | 13   | 3.62 | ns       |
| High methylation: control > MDD, none    |                 |     |     |      |      |          |
| High methylation: control < MDD, none    |                 |     |     |      |      |          |
| Low methylation: control > MDD           |                 |     |     |      |      |          |
| Vermis                                   | 3               | -52 | -2  | 19   | 3.78 | ns       |
| Low methylation: control < MDD           |                 |     |     |      |      |          |
| Left cerebellum/<br>hippocampus*         | -9              | -34 | -20 | 648  | 4.96 | < 0.001  |
| Left middle temporal lobe*               | -54             | -61 | 16  | 120  | 4.92 | < 0.001  |
| Left superior temporal lobe              | -63             | -40 | 16  | 18   | 3.96 | ns       |
| Left superior frontal lobe               | -21             | -1  | 58  | 16   | 3.81 | ns       |
| <b>Positive – neutral pictures</b>       |                 |     |     |      |      |          |
| Diagnosis x methylation interaction      |                 |     |     |      |      |          |
| Right hippocampus*                       | 15              | -7  | -11 | 52   | 4.47 | 0.06‡    |
| High > low methylation                   |                 |     |     |      |      |          |
| Right inferior occipital lobe            | 27              | -91 | -5  | 21   | 3.84 | ns       |
| High < low methylation                   |                 |     |     |      |      |          |
| Right frontal inferior trigonum          | 51              | 32  | 4   | 14   | 3.84 | ns       |
| MDD > control                            |                 |     |     |      |      |          |
| Right heschl gyrus, right insula         | 30              | -37 | 19  | 37   | 3.65 | ns       |
| MDD < control, none                      |                 |     |     |      |      |          |
| High > low methylation in controls       |                 |     |     |      |      |          |
| Right hippocampus*                       | 15              | -10 | -14 | 117  | 5.24 | 0.012    |
| Left amygdala/hippocampus*               | -21             | -1  | -11 | 111  | 4.49 | 0.015    |
| High > low methylation in MDD            |                 |     |     |      |      |          |
| Right cerebellum                         | 12              | -79 | -17 | 28   | 3.77 | ns       |
| Right lingual cortex                     | 24              | -94 | -8  | 25   | 3.76 | ns       |
| High < low methylation in controls       |                 |     |     |      |      |          |
| Right paracentral lobule                 | 6               | -28 | 58  | 13   | 3.64 | ns       |
| High < low methylation in MDD            |                 |     |     |      |      |          |
| Right inferior frontal trigonum          | 48              | 35  | 1   | 26   | 3.81 | ns       |
| High methylation: control > MDD          |                 |     |     |      |      |          |
| Right hippocampus                        | 12              | -10 | -14 | 14   | 3.68 | ns       |
| High methylation: control < MDD          |                 |     |     |      |      |          |
| Right paracentral lobule                 | 3               | -37 | 58  | 31   | 3.75 | ns       |
| Low methylation: control > MDD, none     |                 |     |     |      |      |          |
| Low methylation: control < MDD           |                 |     |     |      |      |          |
| Right hippocampus                        | 21              | -37 | 19  | 101  | 4.13 | 0.022    |
| Left superior temporal lobe              | -60             | -40 | 19  | 10   | 4.22 | ns       |
|                                          | -42             | -13 | -2  | 18   | 3.72 | ns       |
| Right superior temporal lobe             | 54              | -10 | -8  | 15   | 3.69 | ns       |
| Left DMPFC                               | -12             | 38  | 22  | 11   | 3.62 | ns       |
|                                          | -6              | 44  | 22  | 13   | 3.56 | ns       |

**Appendix 1** to Frodl T, Szyf M, Carballedo A, et al. DNA methylation of the serotonin transporter gene (*SLC6A4*) is associated with brain function involved in the processing of emotional stimuli.

*J Psychiatry Neurosci* 2015.

DOI: 10.1503/jpn.140180

**Table S2: Clusters surviving a  $p < 0.001$  uncorrected threshold to allow comparison with the broader literature (part 3 of 4)**

| Contrast, region                                                                                               | MNI coordinates |     |     | k   | t    | p value† |
|----------------------------------------------------------------------------------------------------------------|-----------------|-----|-----|-----|------|----------|
|                                                                                                                | x               | y   | z   |     |      |          |
| <b>Focusing on geometrics following negative pictures – focusing on geometrics following positive pictures</b> |                 |     |     |     |      |          |
| Interaction, none                                                                                              |                 |     |     |     |      |          |
| High < low methylation                                                                                         |                 |     |     |     |      |          |
| Right Rolandic operculum/insula*                                                                               | 39              | -19 | 16  | 50  | 5.71 | 0.005    |
| Right fusiform gyrus                                                                                           | 30              | -55 | -5  | 21  | 4.30 | ns       |
| Right DMPFC                                                                                                    | 12              | 59  | 7   | 14  | 3.53 | ns       |
| Control > MDD                                                                                                  |                 |     |     |     |      |          |
| Right hippocampus                                                                                              | 9               | -16 | -20 | 27  | 4.41 | ns       |
| Control < MDD, none                                                                                            |                 |     |     |     |      |          |
| High < low methylation in MDD                                                                                  |                 |     |     |     |      |          |
| Right inferior orbitofrontal cortex/insula                                                                     | 48              | 23  | -8  | 50  | 4.44 | ns       |
| High > low methylation in MDD                                                                                  |                 |     |     |     |      |          |
| Right pons extending to hippocampus/parahippocampus*                                                           | 9               | -19 | -23 | 123 | 4.5  | 0.019    |
| Left fusiform gyrus                                                                                            | -39             | -43 | -26 | 38  | 4.4  | ns       |
| Right cerebellum                                                                                               | 21              | -46 | -29 | 17  | 3.69 | ns       |
| <b>Focusing on geometrics following positive pictures – focusing on geometrics following neutral pictures</b>  |                 |     |     |     |      |          |
| Interaction, none                                                                                              |                 |     |     |     |      |          |
| MDD < control                                                                                                  |                 |     |     |     |      |          |
| Left inferior frontal operculum                                                                                | -48             | 8   | 10  | 24  | 3.98 | ns       |
| MDD > control                                                                                                  |                 |     |     |     |      |          |
| Right middle temporal cortex                                                                                   | 51              | -7  | 10  | 11  | 3.83 | ns       |
| High < low methylation                                                                                         |                 |     |     |     |      |          |
| Right lingual cortex                                                                                           | 27              | -91 | -8  | 31  | 4.00 | ns       |
| High > low methylation, none                                                                                   |                 |     |     |     |      |          |
| <b>Focusing on geometrics following negative pictures – focusing on geometrics following neutral pictures</b>  |                 |     |     |     |      |          |
| Interaction                                                                                                    |                 |     |     |     |      |          |
| Left thalamus                                                                                                  | 0               | -4  | -8  | 30  | 3.77 | ns       |
| MDD < control, none                                                                                            |                 |     |     |     |      |          |
| MDD > control                                                                                                  |                 |     |     |     |      |          |
| Left inferior temporal lobe                                                                                    |                 |     |     |     |      | ns       |
| High < low methylation, none                                                                                   |                 |     |     |     |      |          |
| High > low methylation, none                                                                                   |                 |     |     |     |      |          |
| <b>Focusing on geometrics – focusing on emotional content both following neutral pictures</b>                  |                 |     |     |     |      |          |
| Interaction, none                                                                                              |                 |     |     |     |      |          |
| High < low methylation                                                                                         |                 |     |     |     |      |          |
| Right superior temporal lobe*                                                                                  | 54              | -34 | 16  | 92  | 5.23 | 0.029    |
| Left insula                                                                                                    | -36             | -10 | 19  | 50  | 4.90 | ns       |
| Right postcentral                                                                                              | 57              | -13 | 19  | 13  | 3.96 | ns       |
| Right middle temporal lobe                                                                                     | 69              | -25 | -11 | 11  | 3.76 | ns       |
| High > low methylation, none                                                                                   |                 |     |     |     |      |          |
| MDD > control, none                                                                                            |                 |     |     |     |      |          |
| MDD < control                                                                                                  |                 |     |     |     |      |          |
| Right fusiform gyrus                                                                                           | 42              | -37 | -23 | 28  | 4.1  | ns       |
| High < low methylation in patients                                                                             |                 |     |     |     |      |          |
| Left insula*                                                                                                   | -36             | -7  | 19  | 51  | 5.00 | 0.05     |
| Right middle temporal lobe*                                                                                    | 48              | -46 | 10  | 78  | 4.81 | 0.05     |
|                                                                                                                | 69              | -25 | -14 | 11  | 4.21 | ns       |
| High < low methylation in controls                                                                             |                 |     |     |     |      |          |
| Right middle cortex cinguli                                                                                    | 9               | 38  | 31  | 23  | 3.87 | ns       |
| Left middle frontal cortex                                                                                     | -33             | 17  | 31  | 12  | 3.6  | ns       |
| High > low methylation in MDD, none                                                                            |                 |     |     |     |      |          |
| High > low methylation in controls, none                                                                       |                 |     |     |     |      |          |
| <b>Focusing on geometrics – focusing on emotional content both following negative pictures</b>                 |                 |     |     |     |      |          |
| Interaction, none                                                                                              |                 |     |     |     |      |          |
| High > low methylation, none                                                                                   |                 |     |     |     |      |          |
| High < low methylation, none                                                                                   |                 |     |     |     |      |          |

**Appendix 1** to Frodl T, Szyf M, Carballedo A, et al. DNA methylation of the serotonin transporter gene (*SLC6A4*) is associated with brain function involved in the processing of emotional stimuli.

*J Psychiatry Neurosci* 2015.

DOI: 10.1503/jpn.140180

| Contrast, region                                                                               | MNI coordinates |     |     | k   | t    | p value† |
|------------------------------------------------------------------------------------------------|-----------------|-----|-----|-----|------|----------|
|                                                                                                | x               | y   | z   |     |      |          |
| Control > MDD, none                                                                            |                 |     |     |     |      |          |
| Control < MDD, none                                                                            |                 |     |     |     |      |          |
| <b>Focusing on geometrics – focusing on emotional content both following positive pictures</b> |                 |     |     |     |      |          |
| Interaction, none                                                                              |                 |     |     |     |      |          |
| High > low methylation, none                                                                   |                 |     |     |     |      |          |
| High < low methylation                                                                         |                 |     |     |     |      |          |
| Pons, brainstem, left cerebellum, parahippocampus*                                             | -12             | -28 | -26 | 172 | 4.51 | 0.004    |
| Control > MDD                                                                                  |                 |     |     |     |      |          |
| Vermis                                                                                         | 6               | -52 | 4   | 15  | 3.57 | ns       |
| Control < MDD, none                                                                            |                 |     |     |     |      |          |
| High > low methylation in controls, none                                                       |                 |     |     |     |      |          |
| High < low methylation in controls, none                                                       |                 |     |     |     |      |          |
| High > low methylation in MDD                                                                  |                 |     |     |     |      |          |
| Right inferior orbitofrontal cortex                                                            | 45              | 23  | -11 | 40  | 3.83 | ns       |
| High < low methylation in MDD                                                                  |                 |     |     |     |      |          |
| Pons, brainstem, left cerebellum, parahippocampus*                                             | -15             | -25 | -26 | 128 | 4.47 | 0.013    |
| Right middle frontal cortex                                                                    | 33              | 2   | 55  | 10  | 3.72 | ns       |

DMPFC = dorsomedial prefrontal cortex; FDR = false discovery rate; FWE = family-wise error; MDD = major depressive disorder; MNI = Montreal Neurological Institute; ns = nonsignificant; SMA = supplementary motor area.  
 \*Survived FWE correction.  
 †FWE-corrected.  
 ‡FDR-corrected.
